# Supplementary material for: Fluorescent mixed ligand copper(ii) complexes of anthracene-appended Schiff bases: studies on DNA binding, nuclease activity and cytotoxicity
Source: Royal Society of Chemistry journal article supplement (doi:10.1039/c5dt00899a), 2015-01-01
Supplement: c5dt00899a1.pdf [file c5dt00899a1.pdf]

**Supporting Information**

**Communicated to : Dalton Trans**  
**MS Type : Article**  
**MS ID : DT-ART-03-2015-000899 R1**

**Fluorescent Mixed Ligand Copper(II) Complexes of Anthracene-appended Schiff Bases: Studies on DNA Binding, Nuclease Activity and Cytotoxicity**

Paramasivam Jaividhya,<sup>a</sup> Mani Ganeshpandian,<sup>a</sup> Rajkumar Dhivya,<sup>c</sup> Mohammad Abdulkadher Akbarsha<sup>d,e</sup> and Mallayan Palaniandavar<sup>a,b\*</sup>

<sup>a</sup>*School of Chemistry, Bharathidasan University, Tiruchirappalli 620 024, India*

<sup>b</sup>*Distinguished Visiting Professor, Department of Chemistry, Indian Institute of Technology Bombay, Powai 400 076, Mumbai, India*

<sup>c</sup>*Department of Animal Science, Bharathidasan University, Tiruchirappalli 620 024, India*

<sup>d</sup>*Mahatma Gandhi -Doerenkamp Center for Alternatives to use of Animals in Life Science Education, Bharathidasan University, Tiruchirappalli, 620 024, India*

<sup>e</sup>*Visiting Professor, Department of Food Sciences and Nutrition, King Saud University, Riyadh 11451, Kingdom of Saudi Arabia*

---

To whom correspondence should be addressed, e-mail: [palanim51@yahoo.com](mailto:palanim51@yahoo.com) and [palaniandavarm@gmail.com](mailto:palaniandavarm@gmail.com)

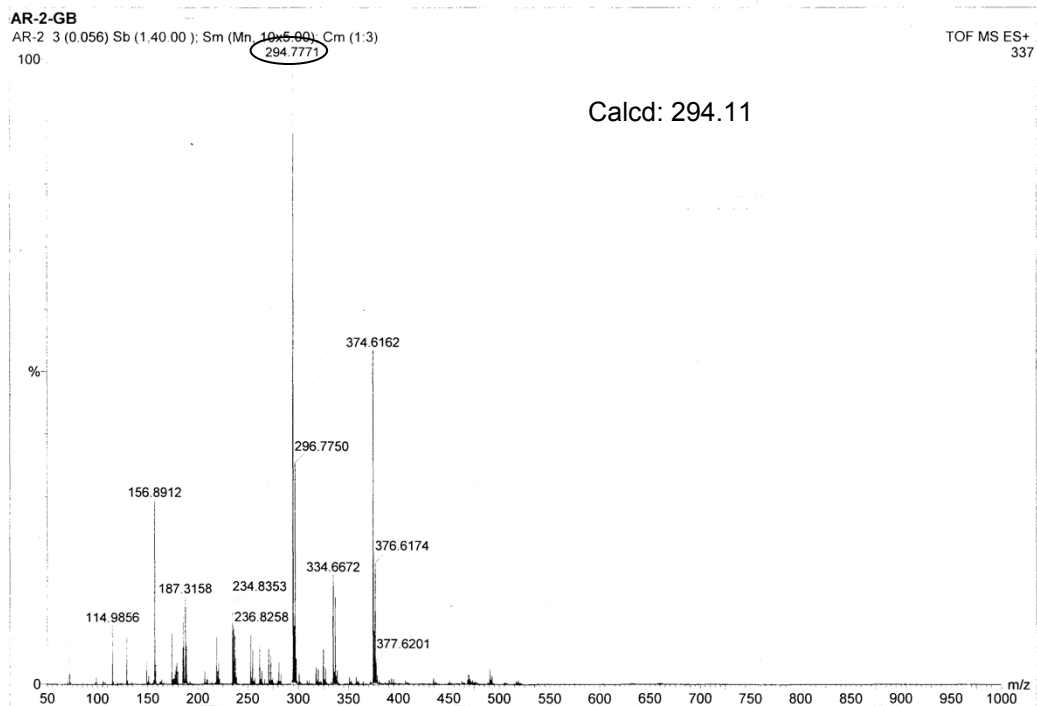

**Figure S1.** ESI-MS spectra of  $[\text{Cu}(\text{L4})(\text{phen})(\text{ACN})]^{2+}$  **4** in acetonitrile.

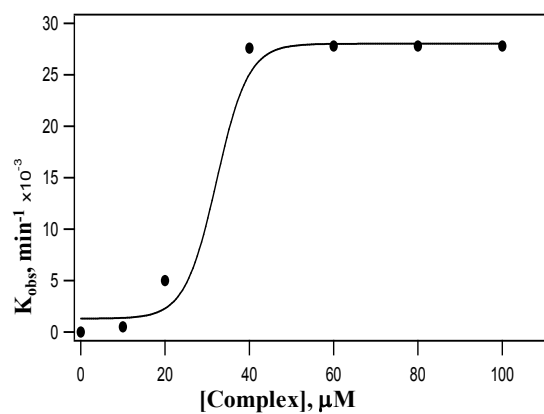

**Figure S2.** Plot showing saturation kinetics for the cleavage of plasmid pUC19 DNA (40  $\mu\text{M}$ ) with different complex concentrations (10 - 100  $\mu\text{M}$ ) of **5** at 37  $^{\circ}\text{C}$  in 5 mM Tris-HCl/50 mM NaCl buffer at pH 7.1.
